# Supplementary material for: Ion intercalation dynamics of electrosynthesized mesoporous WO3 thin films studied by multi-scale coupled electrogravimetric methods
Source: Royal Society of Chemistry journal article supplement (doi:10.1039/c5cp00336a), 2015-01-01
Supplement: c5cp00336a1.pdf [file c5cp00336a1.pdf]

## SUPPORTING INFORMATION:

### A. Synthesis and Structural/Compositional Analysis of $\text{WO}_3$ Thin Films

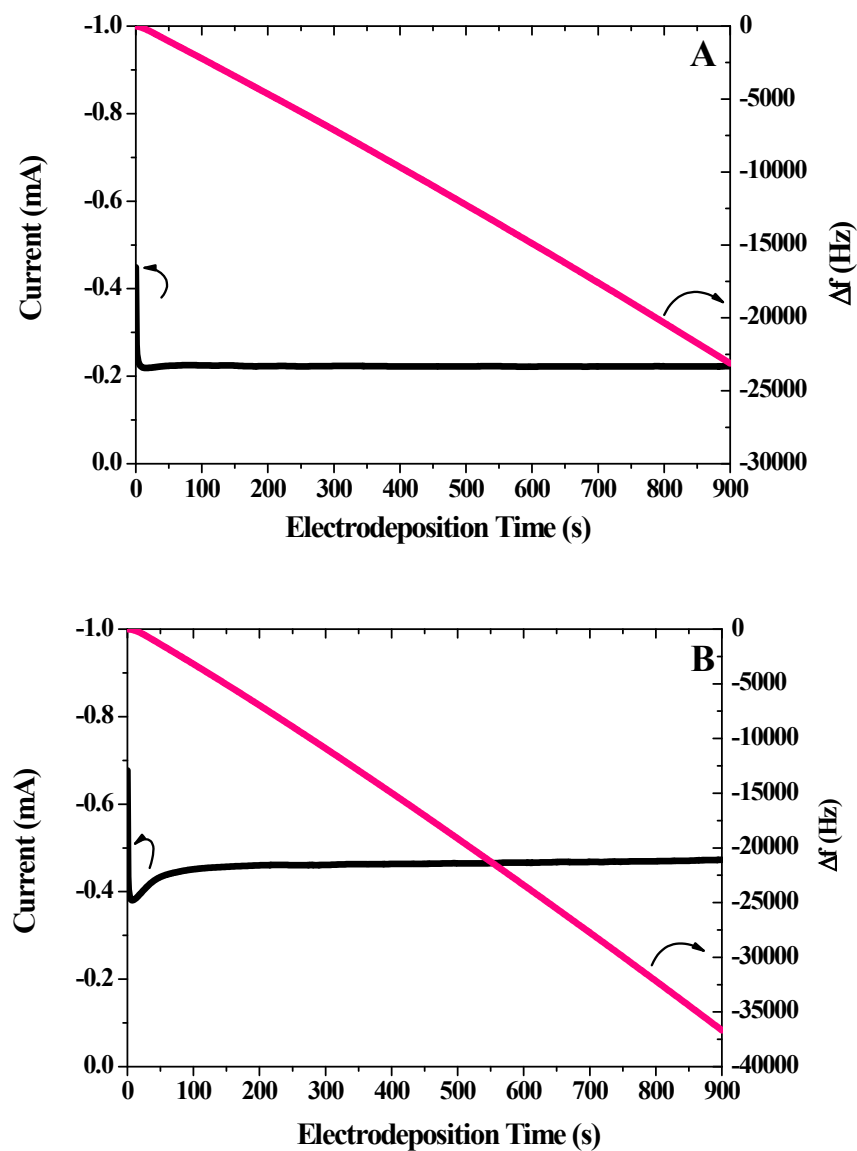

**Figure S1.** Typical electropotentiostatic deposition data and simultaneous QCM characterization (frequency variation of the quartz crystal during electrodeposition) of **A.** dense and **B.** mesoporous  $\text{WO}_3$  thin films.

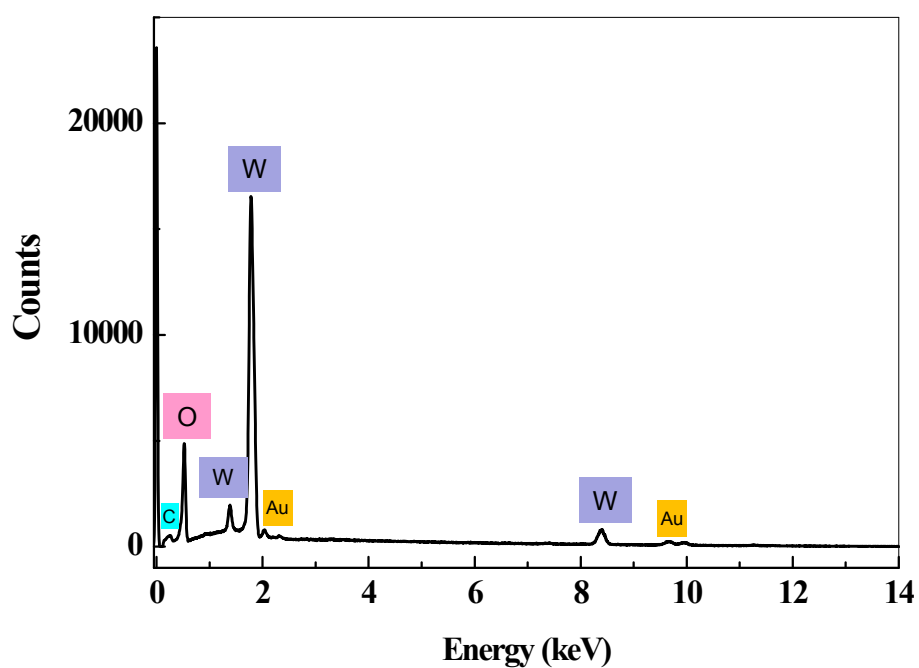

**Fig. S2** Compositional analysis by energy dispersive X-ray (EDX) spectroscopy of a dense  $\text{WO}_3$  thin film (obtained by FEG-SEM equipped with an EDX detector) (substrate: gold electrode of the quartz resonator).

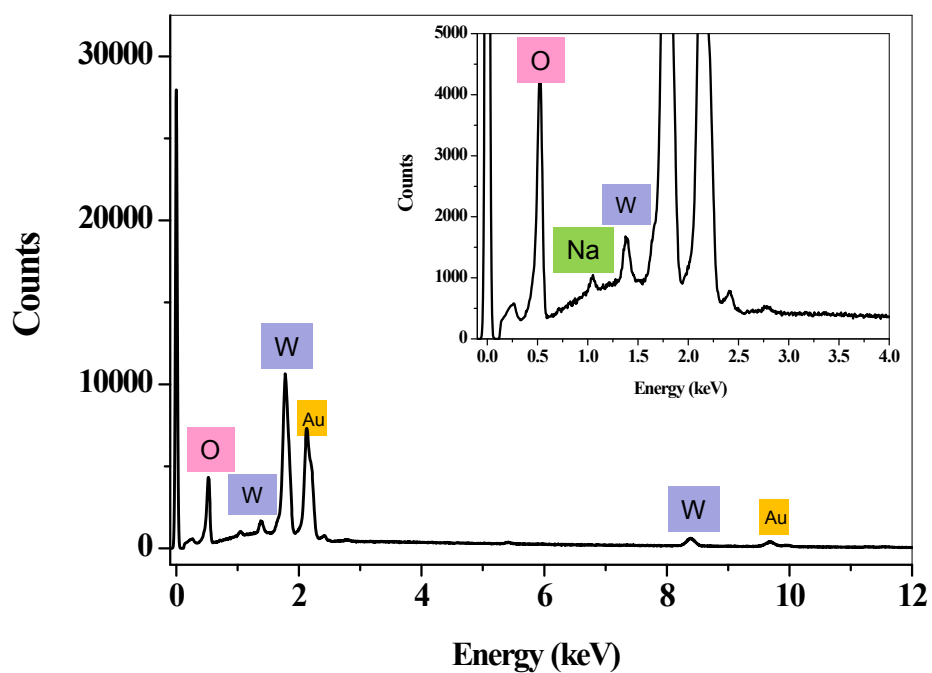

**Fig. S3** Compositional analysis by energy dispersive X-ray (EDX) spectroscopy of an inorganic/organic hybrid  $\text{WO}_3$  thin film before the removal of the SDS surfactant (obtained by FEG-SEM equipped with an EDX detector) (substrate: gold electrode of the quartz resonator).

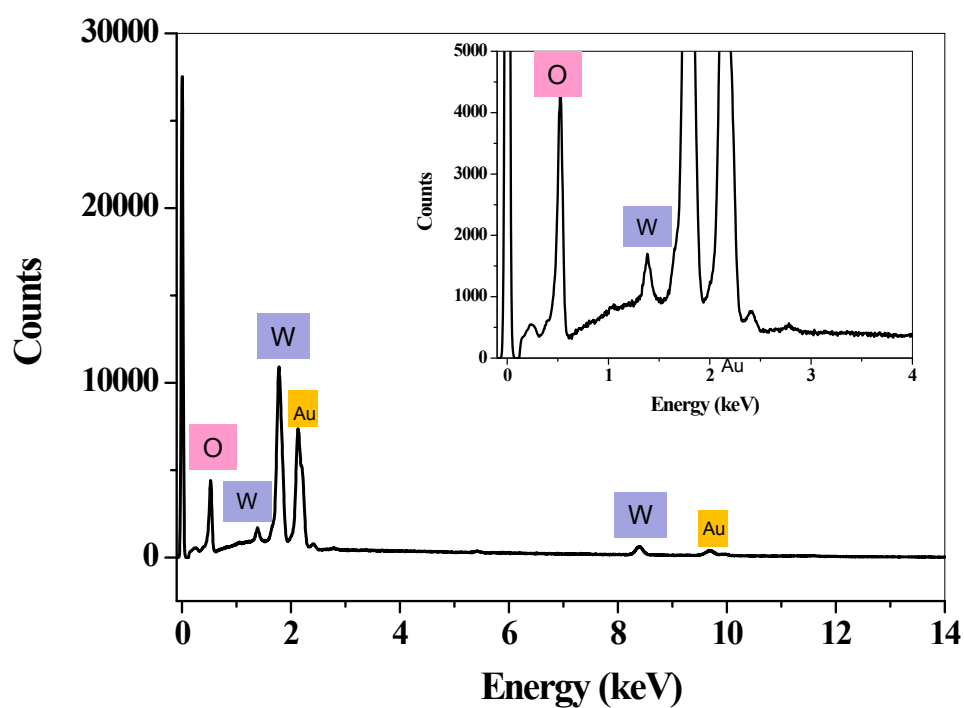

**Fig. S4** Compositional analysis by energy dispersive X-ray (EDX) spectroscopy of a mesoporous  $\text{WO}_3$  thin film after the removal of the SDS surfactant (obtained by FEG-SEM equipped with an EDX detector) (substrate: gold electrode of the quartz resonator).

**B. Theoretical Model with three different sites in WO<sub>3</sub> thin films associated to two cations c1 and c2, and an anion a:**

*(i) Electrochemical reactions and kinetics*

The transfer of two cations (c1 and c2), and an anion (a) in the electroactive films incorporating three different sites, P1, P2, and P3 during the redox reaction of the host material  $\langle P \rangle$  where a single electronic transfer takes place in three independent sites can be expressed as:

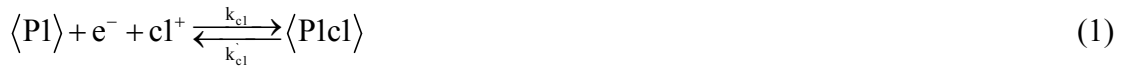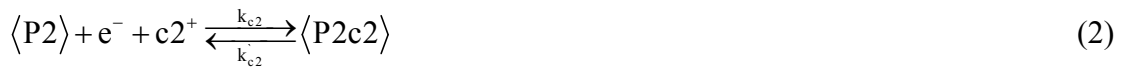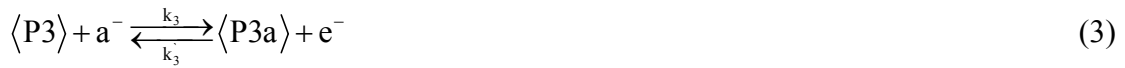

where  $\langle P1c1 \rangle$  and  $\langle P2c2 \rangle$  are the film matrices doped with cations, and  $\langle P3a \rangle$  is the film matrices doped with anions. The cation and anion transfers at the film|solution interface are only taken into account as rate-limiting steps since the ionic transports inside the thin film and in the solution are supposed to be fast enough through thin films or in sufficiently concentrated electrolytes.

The net instantaneous molar flux change of each cations,  $\Delta J_{c1}$  and  $\Delta J_{c2}$ , can be written as follows taking into account the various concentrations and kinetic rate of transfer:

$$J_{c1}(d_f) = -d_f \frac{dC_{c1}}{dt} = k'_{c1} (C_{c1} - C_{c1min}) - k_{c1} (C_{c1max} - C_{c1}) C_{c1sol} \quad (4)$$

$$J_{c2}(d_f) = -d_f \frac{dC_{c2}}{dt} = k'_{c2} (C_{c2} - C_{c2min}) - k_{c2} (C_{c2max} - C_{c2}) C_{c2sol} \quad (5)$$

$$J_a(d_f) = -d_f \frac{dC_a}{dt} = k_a (C_a - C_{amin}) - k'_a (C_{amax} - C_a) C_{asol} \quad (6)$$

By using the Hillman solvation model [A. Jackson, A. R. Hillman, S. Bruckenstein, I. Jureviciute, J. Electroanal. Chem., 524 (2002) 90] the same relationship can be used for the solvent flux:

$$J_s(d_f) = -d_f \frac{dC_s}{dt} = k'_s (C_s - C_{smin}) - k_s (C_{smax} - C_s) \quad (7)$$

where ( $\alpha$ )  $d_f$  is the film thickness; ( $\beta$ )  $C_i$  is the concentration of species i in the film,  $C_{isol}$  is the concentration of species i in the solution by assuming that the diffusion of the ions in

solution does not limit the global kinetics; ( $\chi$ ) the term  $(C_{imax} - C_i)$  is the concentration in free sites for species i at time t, where  $C_{imax}$  is the maximum concentration of the free sites in the film for species i; ( $\delta$ ) the term  $(C_i - C_{imin})$  is the concentration of species i in the film bulk at time t, where  $C_{imin}$  is the minimum concentration of species i in the film.

The kinetic constants which appear here depend on the potential under the classical form:

$$k'_i = k'_{i0} e^{[b'_i(E - E_i^\circ)]} \quad (8)$$

$$k_i = k_{i0} e^{[b_i(E - E_i^\circ)]} \quad (9)$$

where  $E$  is the potential,  $E_i^\circ$  is the apparent normal potential,  $(E - E_i^\circ)$  is the overvoltage,  $k_{i0}$ ,  $k'_{i0}$ ,  $b_{i0}$  and  $b'_{i0}$  are constants.

## (ii) Dynamic regime and flux of each species

Under the effect of a sinusoidal potential perturbation with low amplitude,  $\Delta E$ , imposed to the electrode/film/electrolyte system, sinusoidal fluctuations of concentration,  $\Delta C_i$ , and flux,  $\Delta J_i$ , are observed such as:

$$\Delta J_i = -d_f \frac{dC_i}{dt} = -j\omega d_f \Delta C_i \quad (10)$$

The expression of the global insertion/expulsion flux,  $\Delta J_i$ , which depends on the concentration and potential perturbations, at the film/electrolyte interface is:

$$\Delta J_i = \left( \frac{\partial J_i}{\partial C_i} \right)_E \Delta C_i + \left( \frac{\partial J_i}{\partial E} \right)_{C_i} \Delta E = K_i \Delta C_i (d_f) + G_i \Delta E \quad (11)$$

where  $j = \sqrt{-1}$ ,  $\omega = 2\pi f$  is the pulsation,  $f$  is the perturbation frequency and  $K_i$  and  $G_i$  are the partial derivatives of the flux,  $J_i$ , with respect to the concentration and the potential respectively,  $K_i = \left( \frac{\partial J_i}{\partial C_i} \right)_E$  and  $G_i = \left( \frac{\partial J_i}{\partial E} \right)_{C_i}$ , where  $J_i$  stands for the flux of the species i crossing the film/electrolyte interface. More precisely,  $K_i$  is the kinetics rate of transfer and  $G_i$  is the inverse of the transfer resistance,  $Rt_i$ , of the species at the film/electrolyte interface (where i is the cation c1, cation c2, anion a, or the free solvent s). Therefore, the characteristic frequency,  $f_i$ , of the transfer can be estimated through the following equation:

$$f_i = \frac{K_i}{\pi d_f} \quad (12)$$

The transfer resistance,  $Rt_i$ , can be calculated taking into account the values of  $G_i$ :

$$Rt_i = \frac{1}{FG_i} \quad (13)$$

For each transferred species, the ionic transfer resistance,  $Rt_i$ , is a good estimation of the ease of the transfer.

(iii) *Charge/ potential transfer function,  $\frac{\Delta q}{\Delta E}\bigg|_{th}$*

The charge/potential transfer function,  $\frac{\Delta q}{\Delta E}\bigg|_{th}$ , is calculated for the insertion/expulsion of the two cations,  $c1$  and  $c2$  and an anion,  $a$  and by using the Faraday number,  $F$ , and the film thickness,  $d_f$ :

$$\frac{\Delta q}{\Delta E}\bigg|_{th}(\omega) = -Fd_f \left( \frac{\Delta C_{c1}}{\Delta E}\bigg|_{th} + \frac{\Delta C_{c2}}{\Delta E}\bigg|_{th} - \frac{\Delta C_a}{\Delta E}\bigg|_{th} \right) \quad (14)$$

Then, for the two cations,  $c1$  and  $c2$ , and an anion it comes:

$$\frac{\Delta q}{\Delta E}\bigg|_{th}(\omega) = Fd_f \left( \frac{G_{c1}}{j\omega d_f + K_{c1}} + \frac{G_{c2}}{j\omega d_f + K_{c2}} - \frac{G_a}{j\omega d_f + K_a} \right) \quad (15)$$

(iv) *Electrochemical impedance,  $\frac{\Delta E}{\Delta I}\bigg|_{th}$*

Then, the Faradaic impedance,  $Z_F(\omega)$  relative to the global ionic transfer of the electroactive film for three charged species, cations ( $c1$  and  $c2$ ) and anion involved in the charge compensation is:

$$Z_F\bigg|_{th}(\omega) = \frac{\Delta E}{\Delta I_F}\bigg|_{th}(\omega) = \frac{1}{j\omega \frac{\Delta q}{\Delta E}\bigg|_{th}(\omega)} \quad (16)$$

And using Eq. (15), we can obtain for the Faradaic impedance,  $Z_F$ :

$$Z_F\bigg|_{th}(\omega) = \frac{\Delta E}{\Delta I_F}\bigg|_{th}(\omega) = \frac{1}{jd_f F \left[ \frac{G_{c1}}{(j\omega d_f) + K_{c1}} + \frac{G_{c2}}{(j\omega d_f) + K_{c2}} - \frac{G_a}{(j\omega d_f) + K_a} \right]} \quad (17)$$

Finally, the electrochemical impedance can be estimated incorporating the electrolyte resistance,  $R_{el}$  and the interfacial capacitance,  $C_{dl}$ :

$$\left. \frac{\Delta E}{\Delta I} \right|_{th}(\omega) = R_{el} + \frac{1}{j\omega C_{dl} + \frac{1}{Z_F|_{th}(\omega)}} \quad (18)$$

or with the  $K_i$  and  $G_i$  parameters related to the two cations and an anion:

$$\left. \frac{\Delta E}{\Delta I} \right|_{th}(\omega) = R_{el} + \frac{1}{j\omega C_{dl} + j\omega d_f F j\omega d_f F \left[ \frac{G_{c1}}{(j\omega d_f) + K_{c1}} + \frac{G_{c2}}{(j\omega d_f) + K_{c2}} - \frac{G_a}{(j\omega d_f) + K_a} \right]} \quad (19)$$

When the response of the electrochemical system is perturbed at low frequencies with a parasitic electrochemical reaction, characterized by a parasitic impedance ( $Z_{par}(\omega)$ ) described in equation (20), in parallel with the ionic transfer, the global electrochemical impedance becomes as shown in equation 21.

$$Z_{par}(\omega) = R_{par} + \frac{1}{j\omega C_{par}} \quad (20)$$

$$\left. \frac{\Delta E}{\Delta I} \right|(\omega) = R_{el} + \frac{1}{j\omega C_{dl} + \frac{\Delta I}{\Delta E} \Big|_{ions}(\omega) + \frac{1}{Z_{par}(\omega)}} \quad (21)$$

(v) *Mass/potential transfer function*,  $\left. \frac{\Delta m}{\Delta E} \right|_{th}(\omega)$

The electrogravimetric transfer function,  $\left. \frac{\Delta m}{\Delta E} \right|_{th}(\omega)$ , can be calculated theoretically, taking into account of the uncharged species contribution (solvent molecules in this case) through the two parameters  $K_s$  and  $G_s$ :

$$\left. \frac{\Delta m}{\Delta E} \right|_{th}(\omega) = -d_f \left( m_{c1} \frac{G_{c1}}{(j\omega d_f) + K_{c1}} + m_{c2} \frac{G_{c2}}{(j\omega d_f) + K_{c2}} + m_a \frac{G_a}{(j\omega d_f) + K_a} + m_s \frac{G_s}{(j\omega d_f) + K_s} \right) \quad (22)$$

2)

where  $m_{c1}$ ,  $m_{c2}$ ,  $m_a$  and  $m_s$  are the atomic weight of involved species.



Partial mass/potential TF are also estimated either by removing the c2 contribution, calculating  $\left. \frac{\Delta m}{\Delta E} \right|_{th}^{c1as}(\omega)$  ; or the c1 contribution, calculating  $\left. \frac{\Delta m}{\Delta E} \right|_{th}^{c2as}(\omega)$  ; or the anion contribution, calculating  $\left. \frac{\Delta m}{\Delta E} \right|_{th}^{c1c2s}(\omega)$  .The following equations are used:

In the case of the cation c1, anion and the solvent:

$$\left. \frac{\Delta m}{\Delta E} \right|_{th}^{c1as}(\omega) = d_f \left( (m_{c1} - m_{c2}) \frac{\Delta C_{c1}}{\Delta E} + (m_a + m_{c2}) \frac{\Delta C_a}{\Delta E} + m_s \frac{\Delta C_s}{\Delta E} \right) \quad (23)$$

In the case of the cation c2, anion and the solvent:

$$\left. \frac{\Delta m}{\Delta E} \right|_{th}^{c2as}(\omega) = d_f \left( (m_{c2} - m_{c1}) \frac{\Delta C_{c2}}{\Delta E} + (m_a + m_{c1}) \frac{\Delta C_a}{\Delta E} + m_s \frac{\Delta C_s}{\Delta E} \right) \quad (24)$$

In the case of the cation c1, cation c2, and the solvent:

$$\left. \frac{\Delta m}{\Delta E} \right|_{th}^{c1c2s}(\omega) = d_f \left( (m_{c1} + m_a) \frac{\Delta C_{c1}}{\Delta E} + (m_{c2} + m_a) \frac{\Delta C_2}{\Delta E} + m_s \frac{\Delta C_s}{\Delta E} \right) \quad (25)$$

### C. Partial Electrogravimetric Transfer Functions:

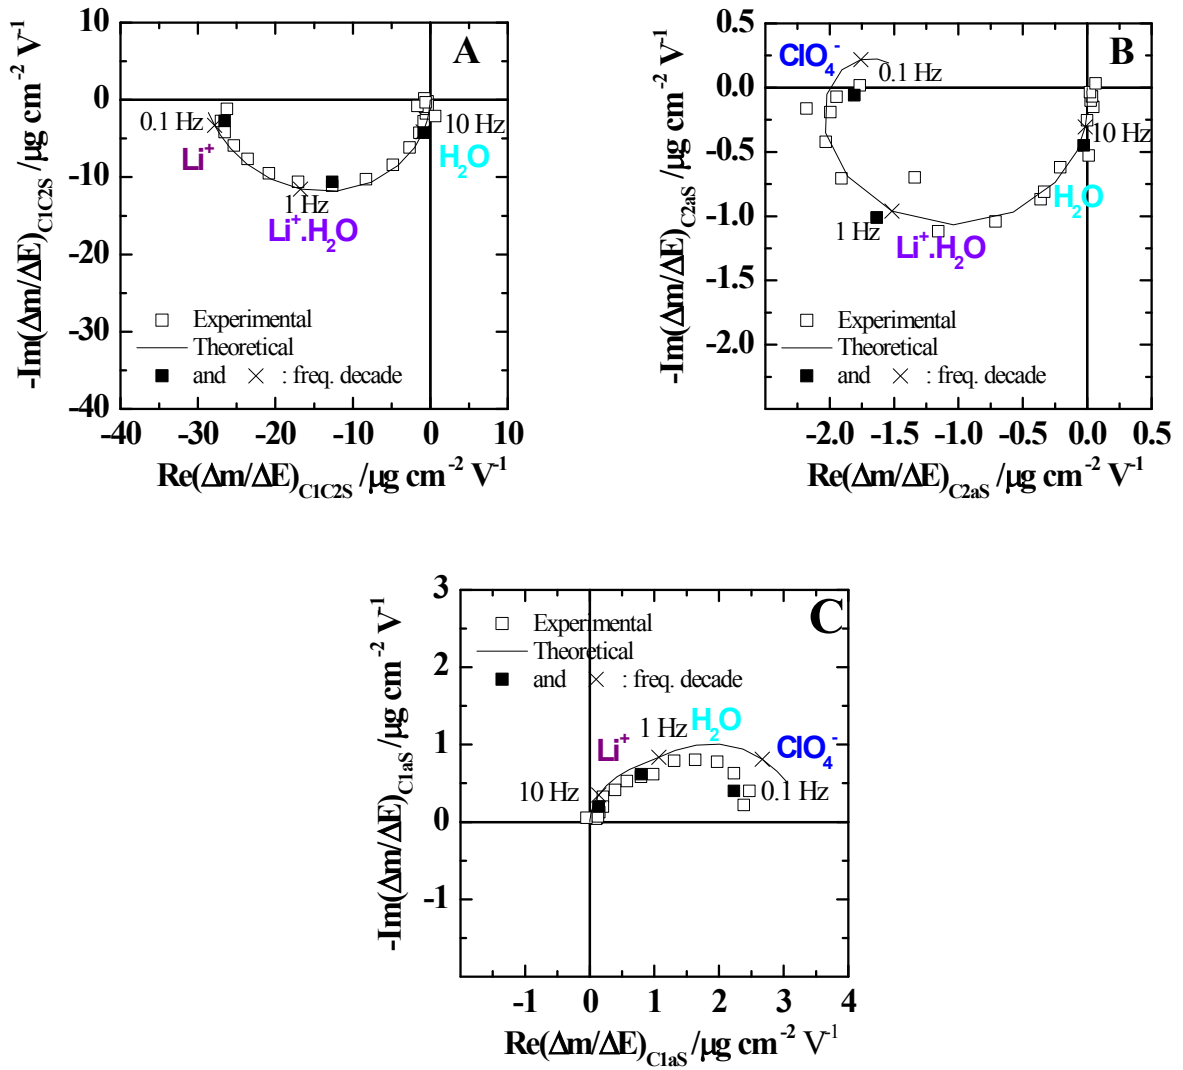

**Fig. S5** Three partial transfer functions, for a mesoporous  $\text{WO}_3$  thin film, (A)  $\left. \frac{\Delta m}{\Delta E} \right|_{\text{Cl}_{2\text{S}}}(\omega)$ , (B)

$\left. \frac{\Delta m}{\Delta E} \right|_{\text{C}_{2\text{aS}}}(\omega)$ , and (C)  $\left. \frac{\Delta m}{\Delta E} \right|_{\text{Cl}_{\text{aS}}}(\omega)$ , measured in aqueous 0.5 M  $\text{LiClO}_4$  electrolyte at -0.3 V vs Ag/AgCl (3M KCl saturated with AgCl) (both experimental and theoretical curves are given).
